# Supplementary material for: Angiocrine Wnt signaling controls liver growth and metabolic maturation in mice
Source: PubMed Central journal article supplement — Hepatology. 2018 Feb 1;68(2):707–22. doi: 10.1002/hep.29613 (PMC6099291; doi:10.1002/hep.29613), 2018-02-01

**Supporting Table S1: Primer list**

| <b>Genotyping Primer name</b> | <b>Version in text</b> | <b>Sequence</b>            |
|-------------------------------|------------------------|----------------------------|
| mm_Wls_Exon3_fw               | Wls                    | TCTGTACACATTCCCCTCCCT      |
| mm_Wls_Exon3_rv               | Wls                    | ACGTGGTACTCTTTTCATGGGC     |
| mm_HMGCR_fw                   | HMGCR                  | CTTGTGGAATGCCTTGTGATTG     |
| mm_HMGCR_rv                   | HMGCR                  | AGCCGAAGCAGCACATGAT        |
| mm_HMOX1_fw                   | HMOX1                  | GGAGATAGAGCGCAACAAGC       |
| mm_HMOX1_rv                   | HMOX1                  | CCATACCAGAAGGCCATGTC       |
| mm_CYP7A1_fw                  | CYP7A1                 | AGCAACTAAACAACCTGCCAGTACTA |
| mm_CYP7A1_rv                  | CYP7A1                 | GTCCGGATATTCAAGGATGCA      |
| mm_ACTB_fw                    | $\beta$ -Actin         | GGATGCCACAGGATTCCATAC      |
| mm_ACTB_rv                    | $\beta$ -Actin         | TCTACGAGGGCTATGCTCTCC      |
| mm_RosaEvi_common_fw          | PRE1                   | GTGCTCTGAGTTGTTATCAG       |
| mm_RosaEvi_flox_rv            | PRE2                   | GACGACAGTATCGGCCTCAGGAAG   |
| mm_RosaEvi_wt_rv              | PRE3                   | CCAGATGACTACCTATCCTCC      |
| mm_GPR177_fw                  | PW1                    | TGTTGGAGGGATTCTTCTGG       |
| mm_GPR177_rv                  | PW2                    | ATTGCCGTGTAGGGTACTGC       |
| Cre_iCre (common)_fw          | PC1                    | AAGAACCTGATGGACATGTTCAGG   |
| iCre_rv                       | PC2                    | TCTGTCAGAGTTCTCCATCAGGGA   |
| mm_YFP_common_fw              | PY1                    | AAAGTCGCTCTGAGTTGTTAT      |
| mm_YFP_flox_rv                | PY2                    | AAGACCGCGAAGAGTTTGTGTC     |
| mm_YFP_wt_rv                  | PY3                    | GGAGCGGGAGAAATGGATATG      |

**Supporting Table S2: markers of liver damage and liver synthesis parameters in plasma**

| Plasma parameter (male) | Mean Ctrl (n=5) | SD Ctrl | Mean Wis-HECKO (n=5) | SD Wis-HECKO (n=5) | p-value (t-test) | Pooled or Satterthwaite | Significance ( P < 0.05) |
|-------------------------|-----------------|---------|----------------------|--------------------|------------------|-------------------------|--------------------------|
| ALT in U/L              | 37              | 15.86   | 30                   | 11.20              | 0.443            | Pooled                  | n.s.                     |
| AST in U/L              | 52.8            | 20.51   | 64.8                 | 22.99              | 0.409            | Pooled                  | n.s.                     |
| GLDH in U/L             | 10.79           | 3.57    | 29.41                | 27.62              | 0.207            | Satterthwaite           | n.s.                     |
| Protein in g/L          | 48.8            | 2.39    | 46.2                 | 2.68               | 0.144            | Pooled                  | n.s.                     |
| Cholinesterase in U/L   | 4853.2          | 946.00  | 4049.00              | 846.23             | 0.194            | Pooled                  | n.s.                     |

| Plasma parameter (female) | Mean Ctrl (n=5) | SD Ctrl | Mean Wis-HECKO (n=5) | SD Wis-HECKO (n=5) | p-value (t-test) | Pooled or Satterthwaite | Significance ( P < 0.05) |
|---------------------------|-----------------|---------|----------------------|--------------------|------------------|-------------------------|--------------------------|
| ALT in U/L                | 22.8            | 3.56    | 21                   | 3.54               | 0.446            | Pooled                  | n.s.                     |
| AST in U/L                | 50.6            | 7.27    | 57.6                 | 15.73              | 0.392            | Pooled                  | n.s.                     |
| GLDH in U/L               | 6.09            | 1.78    | 9.87                 | 3.98               | 0.089            | Pooled                  | n.s.                     |
| Protein in g/L            | 46.6            | 47.4    | 47.4                 | 4.51               | 0.773            | Pooled                  | n.s.                     |
| Cholinesterase in U/L     | 6288.9          | 667.53  | 5620.8               | 488.88             | 0.109            | Pooled                  | n.s.                     |

## Supporting Table S3

### A: Plasma and hepatic sterole levels

| Plasma parameter (male) in g/dL | Mean Ctrl (n=5) | SD Ctrl | Mean Wls-HECKO (n=5) | SD Wls-HECKO (n=5) | p-value (t-test) | Pooled or Satterthwaite | Significance (Bonferroni P < 0.0055) |
|---------------------------------|-----------------|---------|----------------------|--------------------|------------------|-------------------------|--------------------------------------|
| 8-DHC                           | 9.72            | 2.09    | 8.52                 | 3.55               | 0.533            | Pooled                  | n.s.                                 |
| Cholestanol                     | 422.32          | 62.21   | 277.14               | 91.30              | 0.019            | Pooled                  | n.s.                                 |
| Desmosterol                     | 93.90           | 23.59   | 92.98                | 30.30              | 0.959            | Pooled                  | n.s.                                 |
| 7-DHC                           | 33.46           | 14.69   | 22.30                | 10.47              | 0.204            | Pooled                  | n.s.                                 |
| Lathosterol                     | 18.08           | 11.52   | 13.50                | 4.36               | 0.423            | Pooled                  | n.s.                                 |
| b-Sitosterol                    | 471.58          | 111.08  | 320.10               | 113.96             | 0.066            | Pooled                  | n.s.                                 |
| Stigmastanol                    | 5.24            | 2.26    | 4.60                 | 1.09               | 0.584            | Pooled                  | n.s.                                 |
| Campesterol                     | 1558.26         | 278.97  | 1072.12              | 299.22             | 0.029            | Pooled                  | n.s.                                 |
| Lanosterol                      | 11.64           | 3.88    | 9.74                 | 5.71               | 0.556            | Pooled                  | n.s.                                 |

| Plasma parameter (female) in g/dL | Mean Ctrl (n=5) | SD Ctrl | Mean Wls-HECKO (n=5) | SD Wls-HECKO (n=5) | p-value (t-test) | Pooled or Satterthwaite | Significance (Bonferroni P < 0.0055) |
|-----------------------------------|-----------------|---------|----------------------|--------------------|------------------|-------------------------|--------------------------------------|
| 8-DHC                             | 12.00           | 3.81    | 9.26                 | 3.05               | 0.245            | Pooled                  | n.s.                                 |
| Cholestanol                       | 176.98          | 32.54   | 157.64               | 60.24              | 0.545            | Pooled                  | n.s.                                 |
| Desmosterol                       | 59.76           | 16.84   | 44.00                | 11.06              | 0.118            | Pooled                  | n.s.                                 |
| 7-DHC                             | 14.68           | 4.31    | 9.86                 | 1.37               | 0.065            | Satterthwaite           | n.s.                                 |
| Lathosterol                       | 8.96            | 2.05    | 5.36                 | 1.44               | 0.012            | Pooled                  | n.s.                                 |
| b-Sitosterol                      | 285.62          | 72.59   | 253.72               | 79.70              | 0.527            | Pooled                  | n.s.                                 |
| Stigmastanol                      | 3.22            | 1.35    | 3.14                 | 0.85               | 0.913            | Pooled                  | n.s.                                 |
| Campesterol                       | 1218.76         | 227.49  | 1095.28              | 380.94             | 0.551            | Pooled                  | n.s.                                 |
| Lanosterol                        | 5.94            | 2.84    | 3.76                 | 0.67               | 0.163            | Satterthwaite           | n.s.                                 |

| Liver lysate parameter (male) in mg/mg protein | Mean Ctrl (n=5) | SD Ctrl | Mean Wls-HECKO (n=5) | SD Wls-HECKO (n=5) | p-value (t-test) | Pooled or Satterthwaite | Significance (Bonferroni P < 0.0055) |
|------------------------------------------------|-----------------|---------|----------------------|--------------------|------------------|-------------------------|--------------------------------------|
| 8-DHC                                          | 0.79            | 0.34    | 0.66                 | 0.15               | 0.465            | Pooled                  | n.s.                                 |
| Cholestanol                                    | 5.03            | 2.08    | 4.00                 | 1.05               | 0.352            | Pooled                  | n.s.                                 |
| Desmosterol                                    | 1.92            | 1.02    | 1.30                 | 0.43               | 0.251            | Pooled                  | n.s.                                 |
| 7-DHC                                          | 1.68            | 0.57    | 1.40                 | 0.45               | 0.431            | Pooled                  | n.s.                                 |
| Lathosterol                                    | 15.66           | 2.20    | 13.58                | 5.20               | 0.434            | Pooled                  | n.s.                                 |
| b-Sitosterol                                   | 2.01            | 1.03    | 1.28                 | 0.52               | 0.199            | Pooled                  | n.s.                                 |
| Stigmastanol                                   | 92.47           | 11.29   | 78.48                | 29.08              | 0.345            | Pooled                  | n.s.                                 |
| Campesterol                                    | 0.37            | 0.11    | 0.41                 | 0.13               | 0.574            | Pooled                  | n.s.                                 |
| Lanosterol                                     | 23.25           | 4.07    | 21.01                | 3.11               | 0.356            | Pooled                  | n.s.                                 |

| Liver lysate parameter (female) in mg/mg protein | Mean Ctrl (n=5) | SD Ctrl | Mean Wls-HECKO (n=5) | SD Wls-HECKO (n=5) | p-value (t-test) | Pooled or Satterthwaite | Significance (Bonferroni P < 0.0055) |
|--------------------------------------------------|-----------------|---------|----------------------|--------------------|------------------|-------------------------|--------------------------------------|
| 8-DHC                                            | 1.39            | 0.32    | 1.00                 | 0.10               | 0.049            | Satterthwaite           | n.s.                                 |
| Cholestanol                                      | 4.08            | 1.92    | 3.79                 | 1.25               | 0.781            | Pooled                  | n.s.                                 |
| Desmosterol                                      | 1.94            | 1.01    | 1.77                 | 0.49               | 0.749            | Pooled                  | n.s.                                 |
| 7-DHC                                            | 2.84            | 0.95    | 2.00                 | 0.58               | 0.133            | Pooled                  | n.s.                                 |
| Lathosterol                                      | 11.32           | 2.37    | 14.01                | 3.86               | 0.221            | Pooled                  | n.s.                                 |
| b-Sitosterol                                     | 3.13            | 0.94    | 2.45                 | 0.85               | 0.267            | Pooled                  | n.s.                                 |
| Stigmastanol                                     | 105.21          | 23.82   | 130.70               | 34.75              | 0.213            | Satterthwaite           | n.s.                                 |
| Campesterol                                      | 0.67            | 0.55    | 0.37                 | 0.08               | 0.293            | Pooled                  | n.s.                                 |
| Lanosterol                                       | 27.42           | 5.39    | 28.54                | 7.26               | 0.789            | Pooled                  | n.s.                                 |

### B: Dry blood acylcarnitine and amino acid levels (in nmol/ $\mu$ g protein)

| Tested parameters (dry blood cards) (n=47) | Mean Ctrl (n=5) | SD Ctrl  | Mean Wls-HECKO (n=5) | SD Wls-HECKO (n=5) | p-value (t-test) | Pooled or Satterthwaite | Significance (Bonferroni P < 0.001) |
|--------------------------------------------|-----------------|----------|----------------------|--------------------|------------------|-------------------------|-------------------------------------|
| C0                                         | 20.84864        | 1.622325 | 20.35648             | 4.001592           | 0.805255         | Pooled                  | n.s.                                |
| C2                                         | 16.60096        | 1.413986 | 20.58368             | 2.527005           | 0.015221         | Pooled                  | n.s.                                |
| C3                                         | 0.51456         | 0.076009 | 0.6176               | 0.053642           | 0.038312         | Pooled                  | n.s.                                |
| C4                                         | 0.1728          | 0.0257   | 0.17024              | 0.016535           | 0.856076         | Pooled                  | n.s.                                |
| C5_1                                       | 0.02048         | 0.008345 | 0.02304              | 0.008283           | 0.639413         | Pooled                  | n.s.                                |
| C5                                         | 0.11584         | 0.02345  | 0.13248              | 0.028942           | 0.347098         | Pooled                  | n.s.                                |
| C5OH_HMB                                   | 0.09856         | 0.021154 | 0.10112              | 0.016566           | 0.836617         | Pooled                  | n.s.                                |
| C6                                         | 0.05888         | 0.01027  | 0.08                 | 0.021703           | 0.084753         | Pooled                  | n.s.                                |
| C8_1                                       | 0.01728         | 0.003649 | 0.02688              | 0.003649           | 0.003164         | Pooled                  | n.s.                                |
| C8                                         | 0.03904         | 0.009966 | 0.05504              | 0.013838           | 0.069157         | Pooled                  | n.s.                                |
| C10:1                                      | 0.09664         | 0.027472 | 0.11904              | 0.024621           | 0.211597         | Pooled                  | n.s.                                |
| C10                                        | 0.03968         | 0.008032 | 0.04096              | 0.008587           | 0.813797         | Pooled                  | n.s.                                |
| MMA                                        | 0.20928         | 0.035244 | 0.23552              | 0.043442           | 0.324888         | Pooled                  | n.s.                                |
| Glut                                       | 0.08704         | 0.021514 | 0.10048              | 0.026926           | 0.408627         | Pooled                  | n.s.                                |
| C12                                        | 0.03968         | 0.008937 | 0.05376              | 0.010467           | 0.051469         | Pooled                  | n.s.                                |
| MeGlut                                     | 0.02368         | 0.008345 | 0.03392              | 0.007707           | 0.078567         | Pooled                  | n.s.                                |
| C14_1                                      | 0.0672          | 0.019855 | 0.08128              | 0.01272            | 0.218562         | Pooled                  | n.s.                                |
| C14                                        | 0.09664         | 0.010467 | 0.12736              | 0.015742           | 0.00665          | Pooled                  | n.s.                                |
| C14OH                                      | 0.04608         | 0.010757 | 0.04288              | 0.012311           | 0.673189         | Pooled                  | n.s.                                |
| C16_1                                      | 0.09728         | 0.020935 | 0.13632              | 0.025156           | 0.028479         | Pooled                  | n.s.                                |
| C16                                        | 0.7424          | 0.076566 | 0.92736              | 0.057082           | 0.00251          | Pooled                  | n.s.                                |
| C16_1OH                                    | 0.03328         | 0.010757 | 0.04032              | 0.004293           | 0.211168         | Pooled                  | n.s.                                |
| C16OH                                      | 0.05056         | 0.00764  | 0.06016              | 0.013077           | 0.194124         | Pooled                  | n.s.                                |

| Tested parameters (dry blood cards) (n=47) | Mean Ctrl (n=5) | SD Ctrl  | Mean Wls-HECKO (n=5) | SD Wls-HECKO (n=5) | p-value (t-test) | Pooled or Satterthwaite | Significance (Bonferroni P < 0.001) |
|--------------------------------------------|-----------------|----------|----------------------|--------------------|------------------|-------------------------|-------------------------------------|
| C18_1                                      | 0.21632         | 0.044834 | 0.25664              | 0.0477             | 0.205742         | Pooled                  | n.s.                                |
| C18                                        | 0.19392         | 0.028586 | 0.24                 | 0.048425           | 0.104261         | Pooled                  | n.s.                                |
| C18_1OH                                    | 0.04864         | 0.018985 | 0.07168              | 0.024117           | 0.131765         | Pooled                  | n.s.                                |
| C18OH                                      | 0.02496         | 0.007968 | 0.0288               | 0.013194           | 0.592708         | Pooled                  | n.s.                                |
| C18_2                                      | 0.10944         | 0.025938 | 0.1248               | 0.026581           | 0.382124         | Pooled                  | n.s.                                |
| 3HMG                                       | 0.00704         | 0.002677 | 0.01024              | 0.005258           | 0.259845         | Pooled                  | n.s.                                |
| Ala                                        | 121.5072        | 22.17187 | 103.136              | 19.89833           | 0.205251         | Pooled                  | n.s.                                |
| Val                                        | 59.29408        | 10.51636 | 60.75968             | 11.50202           | 0.838707         | Pooled                  | n.s.                                |
| Met                                        | 22.70656        | 11.25498 | 22.97152             | 10.80883           | 0.970644         | Pooled                  | n.s.                                |
| Phe                                        | 22.1984         | 4.290788 | 27.2096              | 5.432534           | 0.144183         | Pooled                  | n.s.                                |
| Tyr                                        | 32.5856         | 8.423213 | 46.48704             | 11.21141           | 0.05748          | Pooled                  | n.s.                                |
| Asp                                        | 36.1504         | 5.099941 | 38.4608              | 9.214838           | 0.636932         | Pooled                  | n.s.                                |
| Glu                                        | 129.8547        | 10.60818 | 143.9373             | 21.00347           | 0.217601         | Pooled                  | n.s.                                |
| Pyg                                        | 2.23616         | 1.203043 | 1.2288               | 0.321723           | 0.135767         | Satterthwaite           | n.s.                                |
| Trp                                        | 20.97408        | 1.95106  | 22.9792              | 3.876071           | 0.331721         | Pooled                  | n.s.                                |
| Pro                                        | 211.8848        | 73.36309 | 225.0912             | 52.8388            | 0.752333         | Pooled                  | n.s.                                |
| His                                        | 1127.94         | 1500.006 | 778.1069             | 938.7162           | 0.670145         | Pooled                  | n.s.                                |
| Thr                                        | 67.3088         | 9.105629 | 72.89792             | 13.92564           | 0.474086         | Pooled                  | n.s.                                |
| Gly                                        | 193.7158        | 38.08381 | 207.593              | 27.99063           | 0.529909         | Pooled                  | n.s.                                |
| Orn                                        | 26.0864         | 5.547613 | 41.10848             | 22.62555           | 0.215409         | Satterthwaite           | n.s.                                |
| Arg                                        | 57.89248        | 7.476778 | 64.58368             | 15.13921           | 0.401404         | Pooled                  | n.s.                                |
| Cit                                        | 22.1536         | 3.335288 | 27.9136              | 3.226173           | 0.024086         | Pooled                  | n.s.                                |
| Asa                                        | 0.2336          | 0.066318 | 0.27392              | 0.080275           | 0.411779         | Pooled                  | n.s.                                |
| Hci                                        | 0.92224         | 0.183957 | 0.8832               | 0.156064           | 0.726824         | Pooled                  | n.s.                                |

### C: Plasma and hepatic totale bile acid levels

| Plasma total bile acid in $\mu\text{M}$ | Mean Ctrl (n=5) | SD Ctrl | Mean Wls-HECKO (n=5) | SD Wls-HECKO (n=5) | p-value (t-test) | Pooled or Satterthwaite | Significance (P < 0.05) |
|-----------------------------------------|-----------------|---------|----------------------|--------------------|------------------|-------------------------|-------------------------|
| Male                                    | 12.73           | 12.55   | 31.36                | 28.46              | 0.217            | Pooled                  | n.s.                    |
| Female                                  | 5.44            | 1.50    | 22.57                | 24.36              | 0.191            | Satterthwaite           | n.s.                    |

| Liver total bile acid in $\mu\text{M}$ /mg protein | Mean Ctrl (n=5) | SD Ctrl | Mean Wls-HECKO (n=5) | SD Wls-HECKO (n=5) | p-value (t-test) | Pooled or Satterthwaite | Significance (P < 0.05) |
|----------------------------------------------------|-----------------|---------|----------------------|--------------------|------------------|-------------------------|-------------------------|
| Male                                               | 0.68            | 0.30    | 1.08                 | 0.31               | 0.0723           | Pooled                  | n.s.                    |
| Female                                             | 1.06            | 0.43    | 1.52                 | 0.98               | 0.368            | Pooled                  | n.s.                    |

## Supporting Figure legends

**Supporting Fig. S1.** Stab2-Cre recombinase activity in the portal area of the hepatic lobule. Co-immunofluorescence (63x objective) of HEC in Wls-HECKO;eYFP liver show Stab2-Cre mediated cytoplasmatic eYFP (green) expression (arrows) along with membranous ICAM1 (blue) expression.

\* marks a hepatic artery, # marks periportal LSEC area, PV = Portal Vein branch, Scale bar = 50 $\mu$ m, n=5.

**Supporting Fig. S2.** Stab2-Cre recombinase activity in the pericentral area of the hepatic lobule. Co-immunofluorescence (63x objective) of HEC in Wls-HECKO;eYFP liver show Stab2-Cre mediated eYFP (green) expression (arrows) along with membranous ICAM1 (blue) expression.

§ marks pericentral LSEC area, CV = Central Vein, Scale bar = 50 $\mu$ m, n=5.

**Supporting Fig. S3.** Stab2-Cre recombinase activity in the hepatic lobule. Co-immunofluorescence (63x objective) of HEC in Wls-HECKO;eYFP liver show Stab2-Cre mediated eYFP (green) expression (arrows) in pericentral, EMCN (red) positive HEC and midzonal LYVE1 (blue) positive HEC.

§ marks a pericentral LSEC, CV = Central Vein, PV = Portal Vein branch, Scale bar = 50 $\mu$ m, n=5.

**Supporting Fig. S4.** Stab2-Cre recombinase activity during different developmental stages. A: Co-immunofluorescence (63x objective) of HEC in 6 week old eYFP-reporter mouse liver shows Stab2-Cre mediated eYFP (green) in pericentral (left) and periportal (right) areas of the lobule. Pericentral HEC marker EMCN (red) and membranous ICAM1 (blue) expression was used for orientation. B: Co-immunofluorescence (63x objective and zoom) of HEC in the fetal liver (E11.5). eYFP (green), LYVE1 (blue) and Stab2 (red) triple-positive cells represent developing HEC.

CV = Central Vein area, PF = Portal Field area, Scale bar = 50 $\mu$ m (A), 20 $\mu$ m (B), n=3.

Single eYFP+ non-endothelial cells with a round morphology in the fetal liver were negative for Stab2 and Lyve1. Previously it was shown that approximately 10% of these cells are Kit+ and few of them are Ter119+, indicating that they correspond to hematopoietic progenitor cells or hematopoietic stem cells in the fetal liver (1) with previous Stab2-expression or Stab2-promoter activation. No corresponding non-endothelial cells were found in adult livers of 6 or 12 week old mice.

**Supporting Fig. S5.** Ultratructure of LSEC and the Space Of Disse in Wls-HECKO and Ctrl livers in Transmission Electron Microscopy.

Black arrows indicate fenestrations, n=3, 8 week old female mice were used.

Black spots in HC correspond to glycogen which has a high density due to the the fixation process with osmium-tetroxide.

**Supporting Fig. S6** Hepatic HMGCR and CYP7A1 expression shown by qRT-PCR. Fold change relative to  $\beta$ -Actin is shown, Ctrl was set to 1. Bars represent SEM. Mean fold induction in Wls-HECKO did not reach statistical significance.

Mice used were 12-week old males, n=7.

**Supporting Fig. S7.** Ultrastructure of bile canaliculi in Wls-HECKO and Ctrl livers in Transmission Electron Microscopy.

White arrows indicate tight junctions, n=3, 8 week old female mice were used.

White spots in HC correspond to glycogen removed during the fixation process with osmium-ferrocyanide.

## References

1. **Geraud C, Koch PS, Zierow J**, Klapproth K, Busch K, Olsavszky V, Leibing T, et al. GATA4-dependent organ-specific endothelial differentiation controls liver development and embryonic hematopoiesis. J Clin Invest 2017.

**Author names in bold designate shared co-first authorship**

# Supporting Figure S1

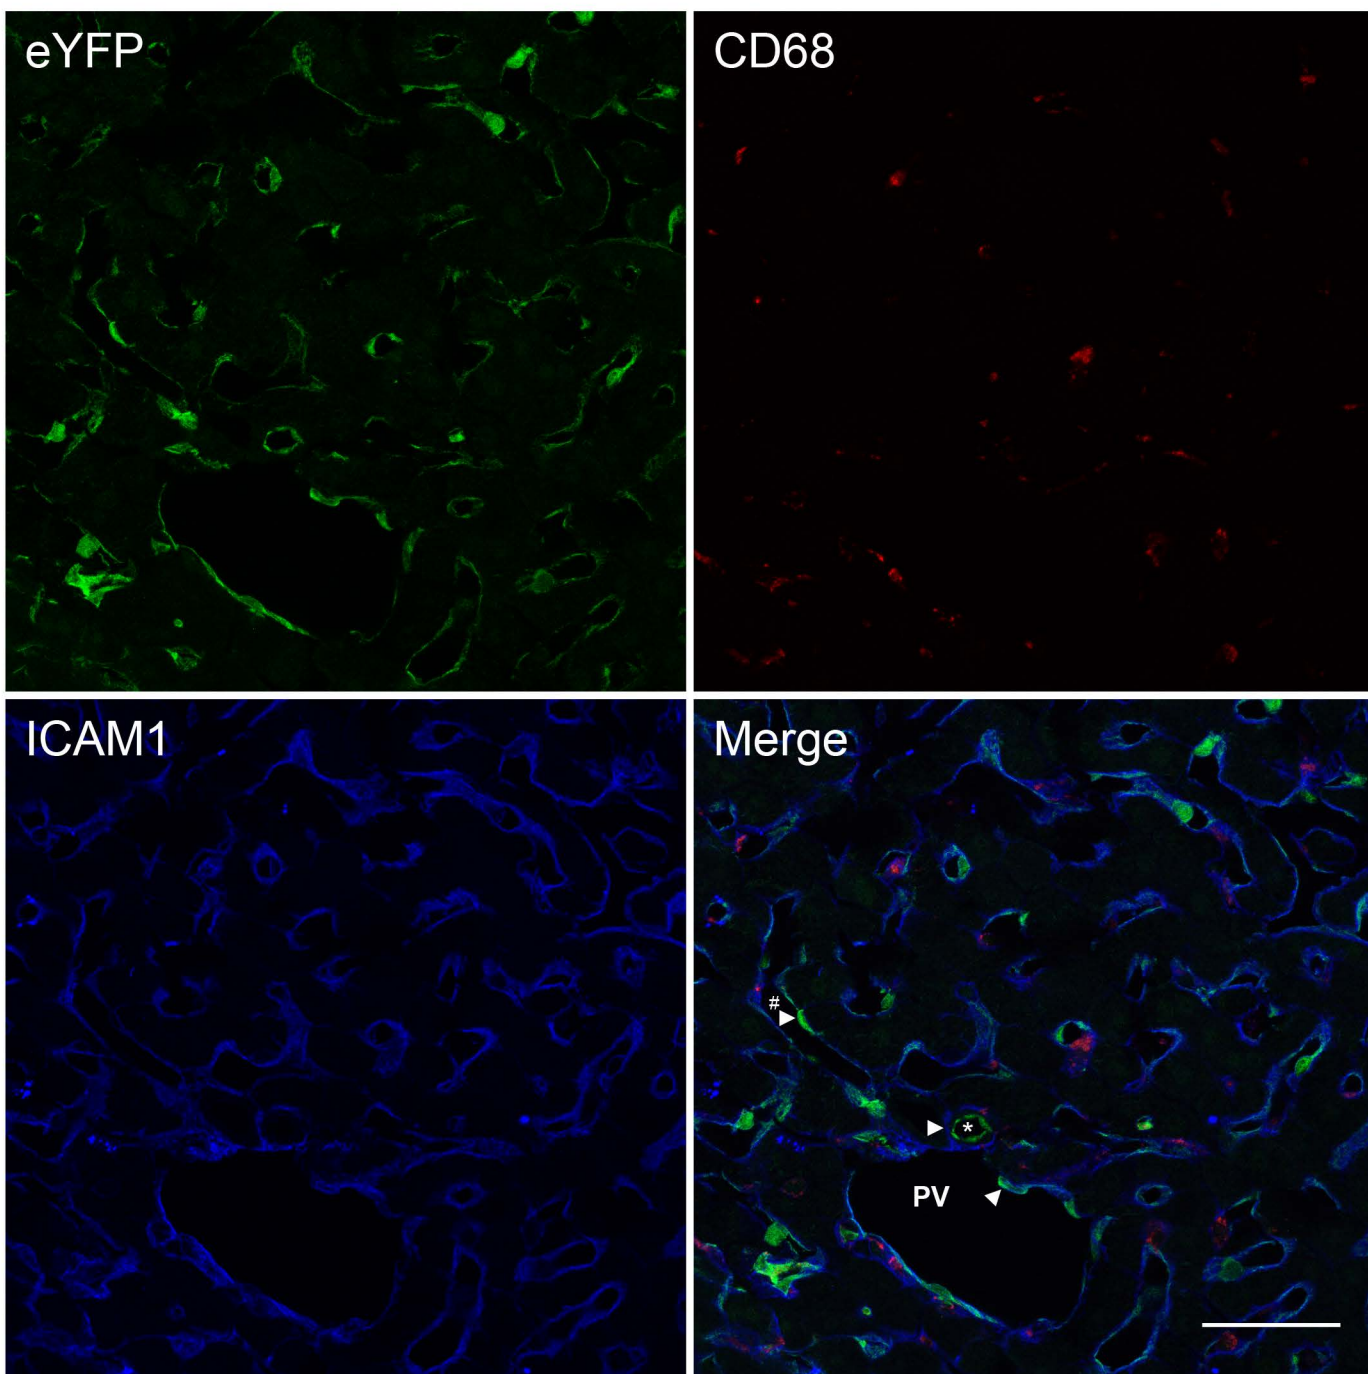

Wls-HECKO;eYFP



# Supporting Figure S2

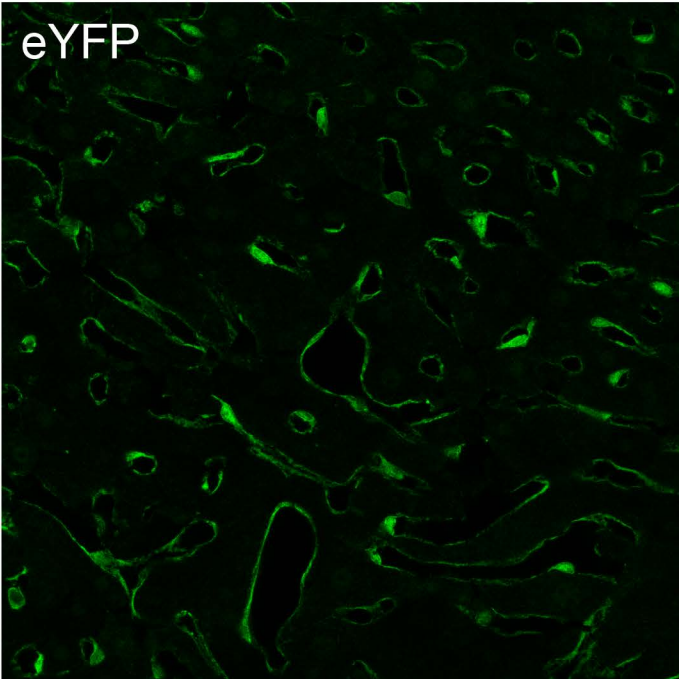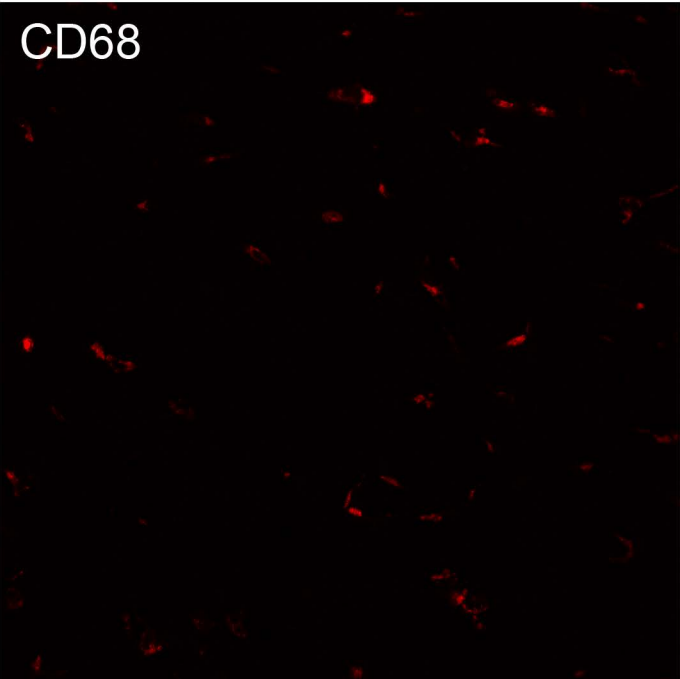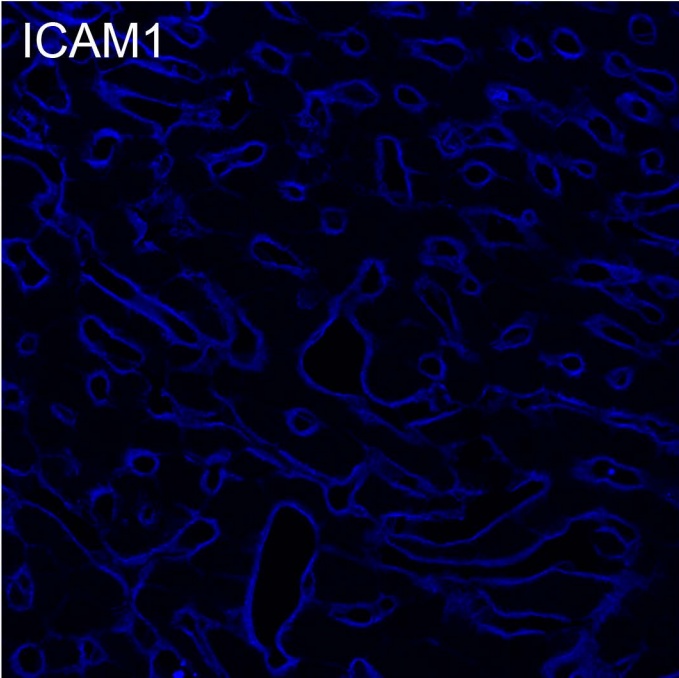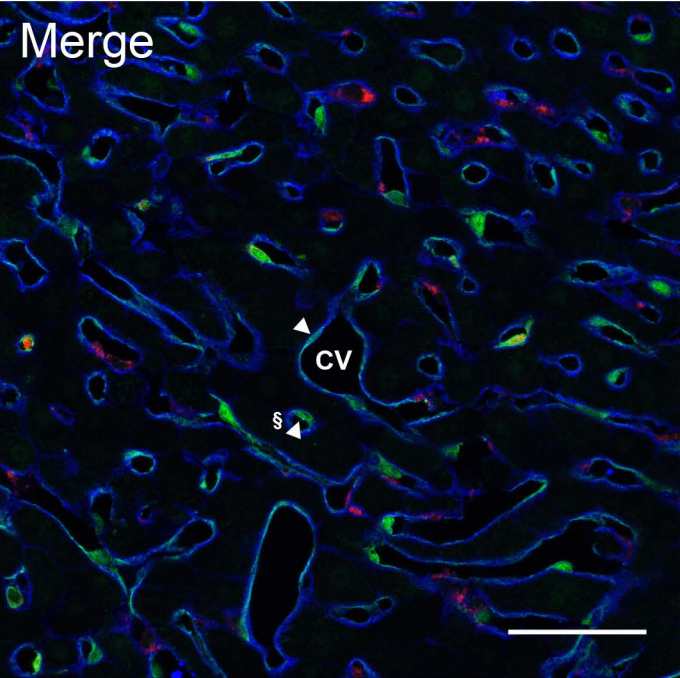

Wls-HECKO;eYFP

# Supporting Figure S3

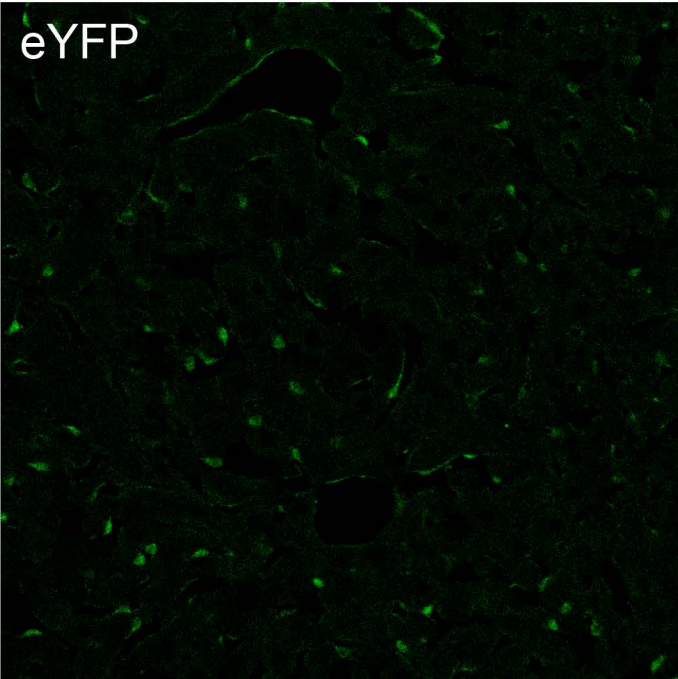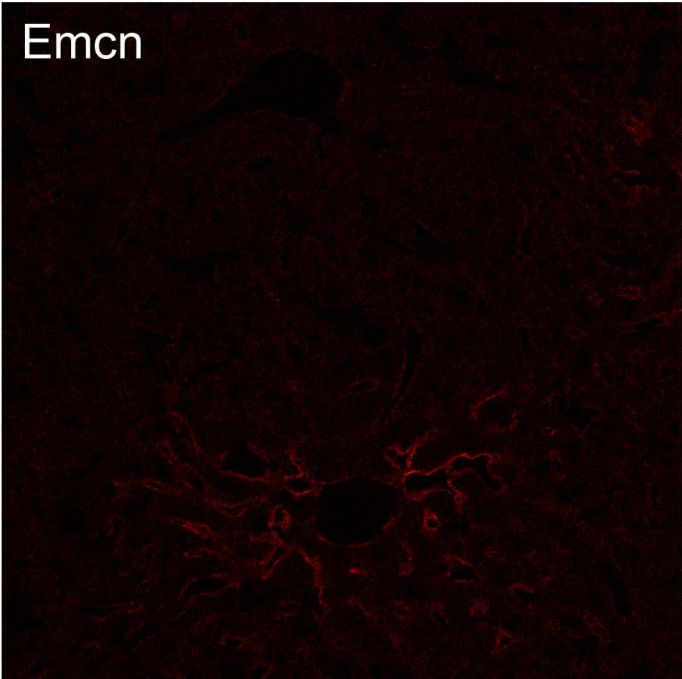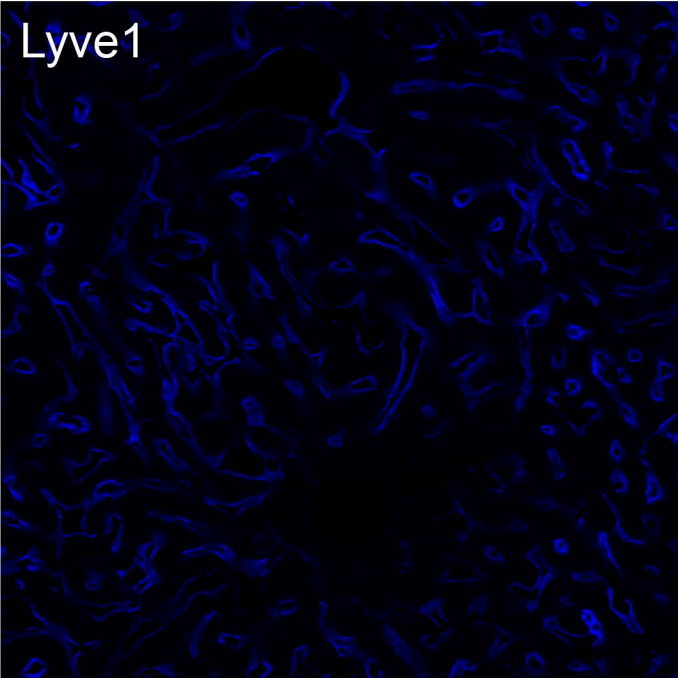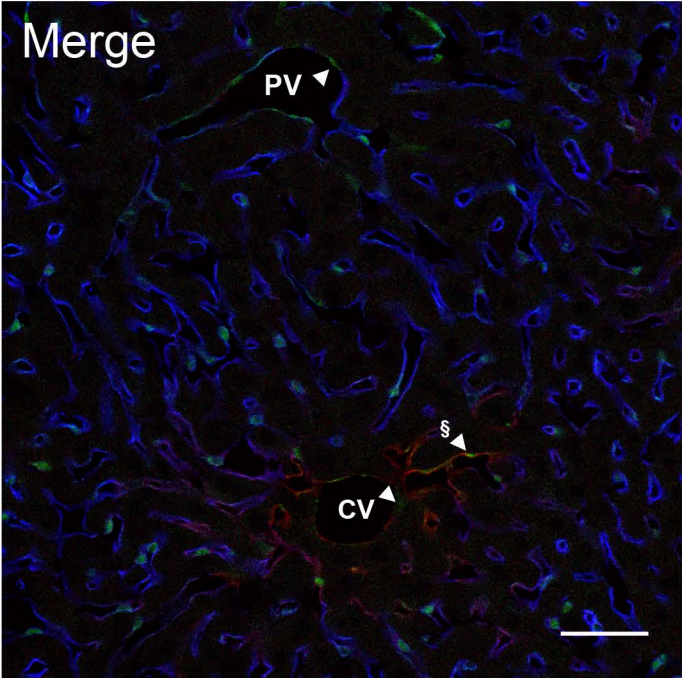

Wls-HECKO;eYFP

# Supporting Figure S4

**A**

CV

6 wk Stab2-Cre<sup>tg/wt</sup>;eYFP<sup>fl/wt</sup>

PF

6 wk Stab2-Cre<sup>tg/wt</sup>;eYFP<sup>fl/wt</sup>

eYFP Emcn Icam1

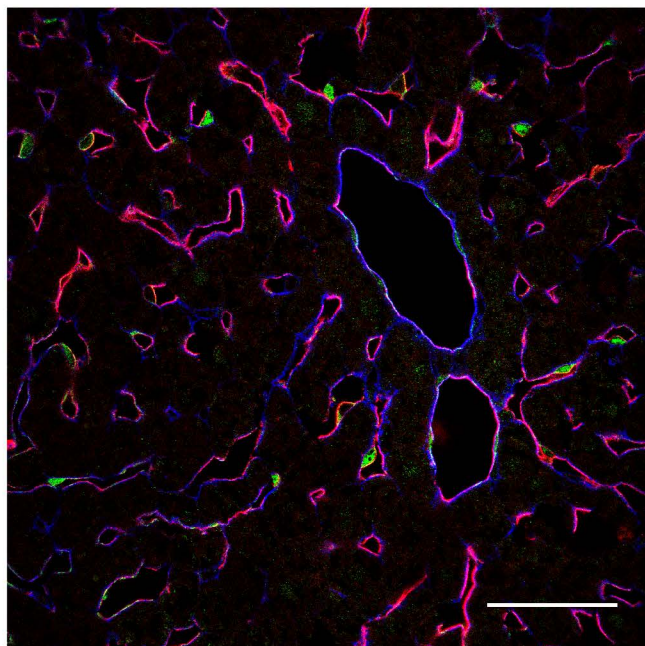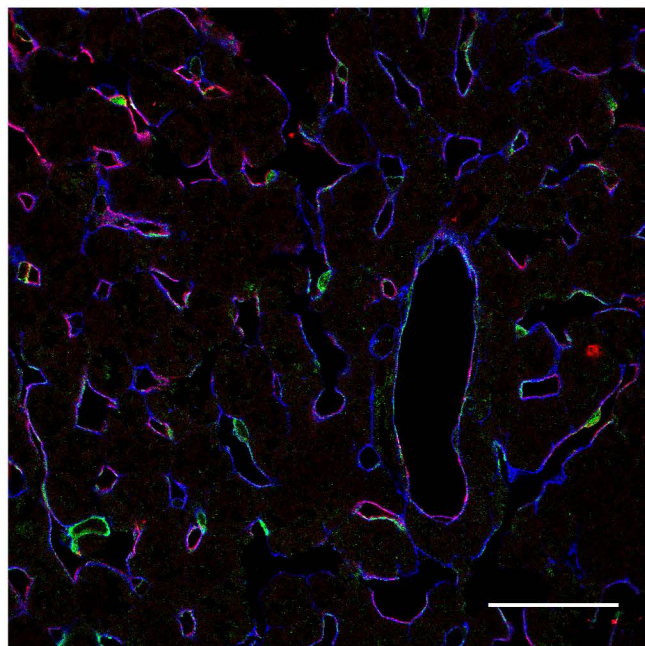

**B**

Fetal liver

E11.5 Stab2-Cre<sup>tg/wt</sup>;eYFP<sup>fl/wt</sup>

eYFP Stab2 Lyve1

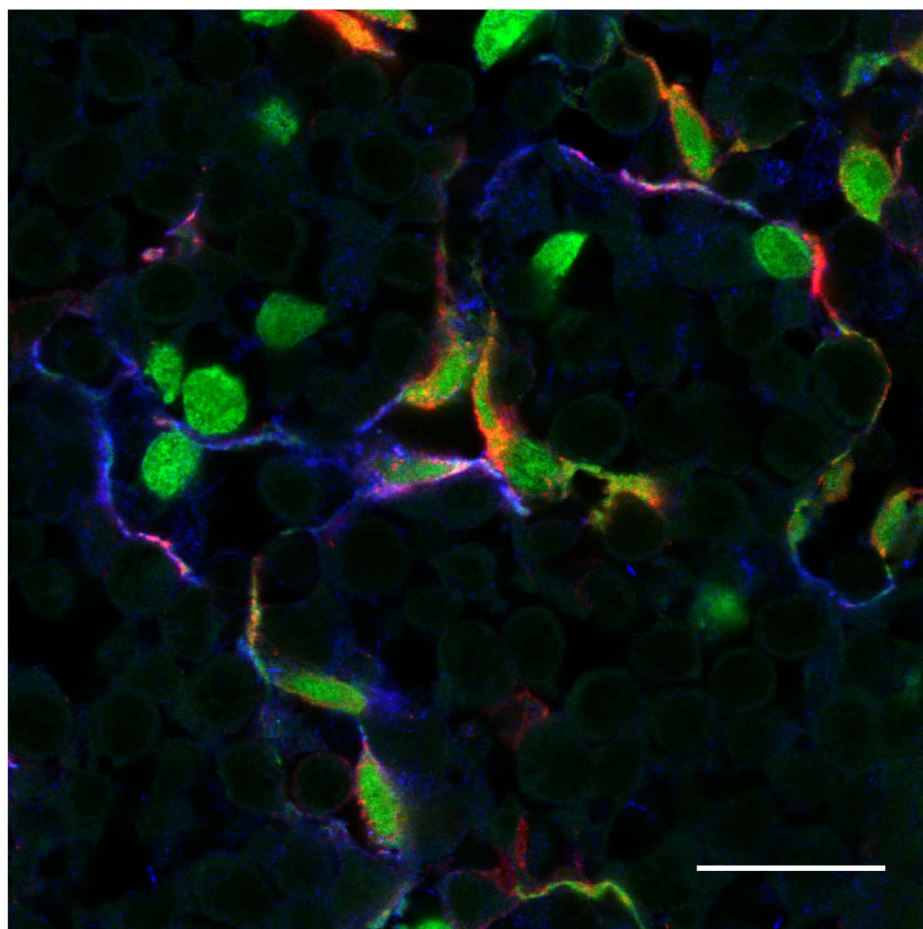

# Supporting Figure S5

Ctrl

Wls-HECKO

5000x

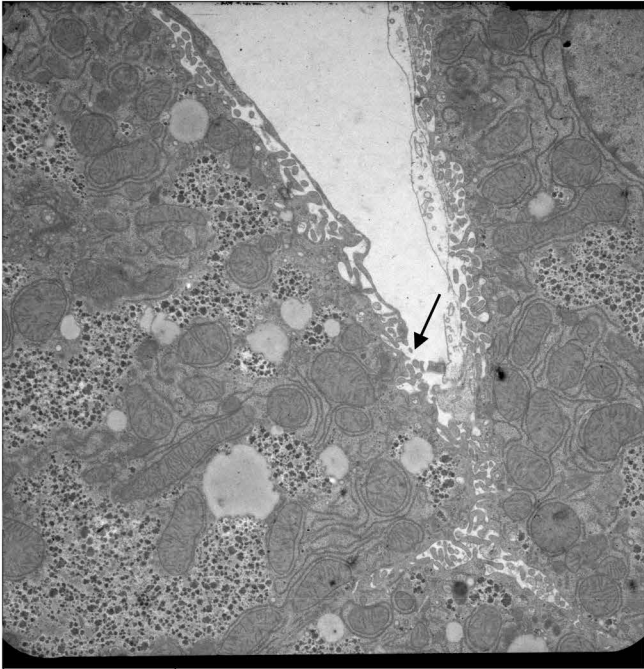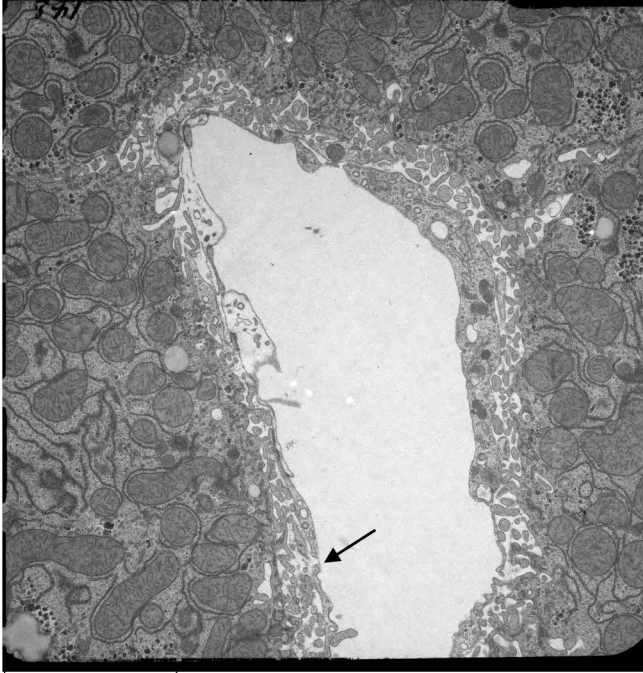

12500x

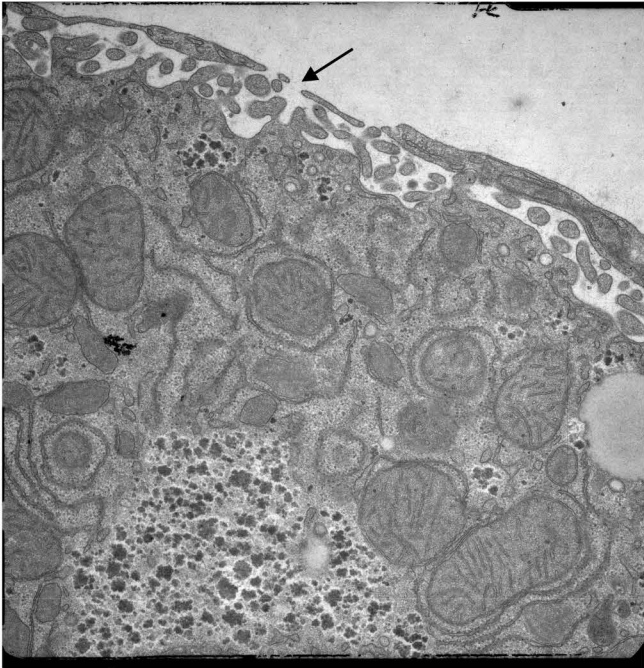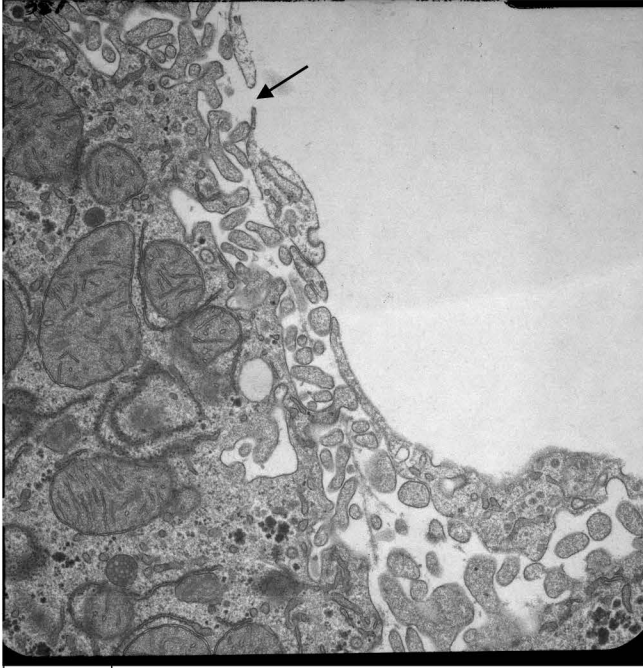

# Supporting Figure S6

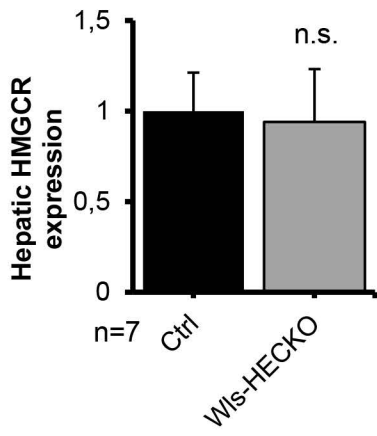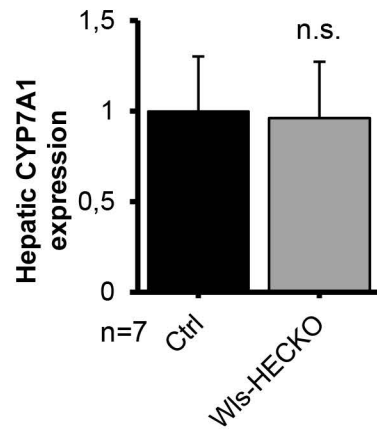

# Supporting Figure S7

Ctrl

Wls-HECKO

12500x

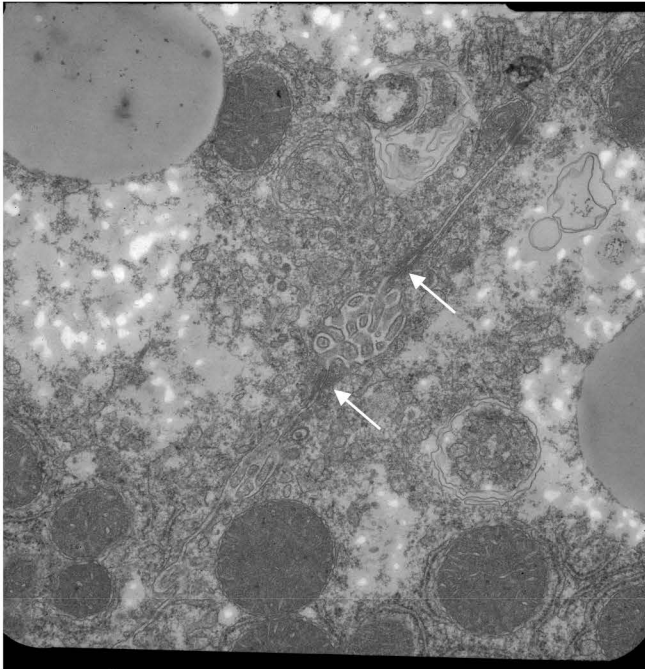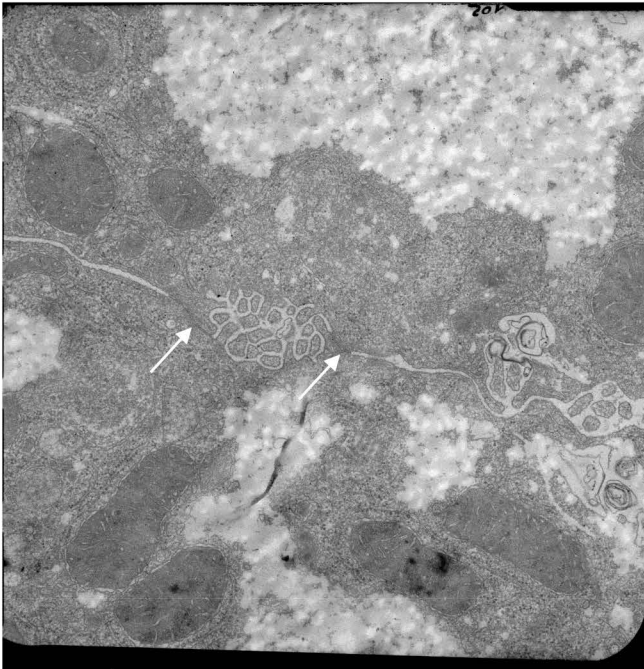

Supplement: HEP-68-707-s001.pdf [file HEP-68-707-s001.pdf]
